# Supplementary material for: Combined Effect of Free Nitrous Acid Pretreatment and Sodium Dodecylbenzene Sulfonate on Short-Chain Fatty Acid Production from Waste Activated Sludge
Source: PubMed Central journal article supplement (PMC4751509; doi:10.1038/srep21622), 2016-02-12
Supplement: srep21622-s1.pdf [file srep21622-s1.pdf]

## Supporting Information

### Combined Effect of Free Nitrous Acid Pretreatment and Sodium Dodecylbenzene Sulfonate on Short-Chain Fatty Acid Production from Waste Activated Sludge

Jianwei Zhao<sup>1,2,†</sup>, Yiwen Liu<sup>3,†</sup>, Bingjie Ni<sup>3</sup>, Qilin Wang<sup>3</sup>, Dongbo Wang<sup>1,2,3\*</sup>, Qi Yang<sup>1,2</sup>, Yingjie Sun<sup>4</sup>, Guangming Zeng<sup>1,2</sup>, Xiaoming Li<sup>1,2\*</sup>

<sup>1</sup> College of Environmental Science and Engineering, Hunan University, Changsha 410082, P.R. China

<sup>2</sup> Key Laboratory of Environmental Biology and Pollution Control (Hunan University), Ministry of Education, Changsha 410082, P.R. China

<sup>3</sup> Advanced Water Management Centre, The University of Queensland, QLD 4072, Australia

<sup>4</sup> School of Environment and Municipal Engineering, Qingdao Technological University, Qingdao 266033, P.R. China

---

\* Corresponding author. Tel.: +86 731 88823967; fax: +86 731 88822829.

E-mail addresses: w.dongbo@yahoo.com (D. Wang); xmli@hnu.edu.cn (X. Li).

**Table S1. Variation of NO<sub>2</sub><sup>-</sup>-N in the combined FNA and SDBS treatment reactors with time.<sup>a</sup>**

| Reactor            | Treatment time (d) |             |             |             |            |
|--------------------|--------------------|-------------|-------------|-------------|------------|
|                    | 0                  | 3           | 6           | 9           | 15         |
| 0.51 mg FNA/L+SDBS | 200.0 ± 2.1        | 85.6 ± 1.5  | 27.2 ± 1.1  | 5.3 ± 0.1   | 0.5 ± 0.1  |
| 0.77 mg FNA/L+SDBS | 300.0 ± 2.8        | 192.7 ± 2.2 | 91.5 ± 2.2  | 21.6 ± 0.2  | 2.5 ± 0.1  |
| 1.54 mg FNA/L+SDBS | 600.0 ± 4.2        | 428.9 ± 3.6 | 185.6 ± 5.6 | 37.9 ± 0.6  | 5.2 ± 0.1  |
| 2.31 mg FNA/L+SDBS | 900.0 ± 4.3        | 723.9 ± 3.9 | 425.1 ± 6.7 | 156.9 ± 3.2 | 21.6 ± 0.2 |
| 3.08 mg FNA/L+SDBS | 1350.0 ± 4.5       | 821.6 ± 5.4 | 438.9 ± 6.2 | 185.4 ± 4.1 | 26.8 ± 0.2 |

<sup>a</sup> Error bars represent standard deviations of triplicate measurements, and NO<sub>2</sub><sup>-</sup>-N concentrations are expressed in mg/L.

**Table S2. Variation of NO<sub>3</sub><sup>-</sup>-N in the combined FNA and SDBS treatment reactors with time.<sup>a</sup>**

| Reactor            | Treatment time (d) |            |            |           |            |
|--------------------|--------------------|------------|------------|-----------|------------|
|                    | 0                  | 3          | 6          | 9         | 15         |
| 0.51 mg FNA/L+SDBS | 24.3 ± 2.1         | 13.6 ± 1.5 | 6.7 ± 0.4  | 2.4 ± 0.3 | 0.1 ± 0.05 |
| 0.77 mg FNA/L+SDBS | 24.3 ± 2.1         | 15.4 ± 1.7 | 7.8 ± 0.6  | 3.2 ± 0.4 | 0.3 ± 0.1  |
| 1.54 mg FNA/L+SDBS | 24.3 ± 2.1         | 16.7 ± 2.1 | 8.2 ± 0.5  | 4.6 ± 0.4 | 0.5 ± 0.1  |
| 2.31 mg FNA/L+SDBS | 24.3 ± 2.1         | 18.2 ± 1.8 | 9.5 ± 0.8  | 5.1 ± 0.6 | 0.6 ± 0.1  |
| 3.08 mg FNA/L+SDBS | 24.3 ± 2.1         | 18.9 ± 2.4 | 10.2 ± 1.4 | 5.5 ± 0.7 | 0.8 ± 0.1  |

<sup>a</sup> Error bars represent standard deviations of triplicate measurements, and NO<sub>3</sub><sup>-</sup>-N concentrations are expressed in mg/L.

**Table S3. Variations of SDBS with fermentation time in the fermentation system <sup>a</sup>**

| Fermentation time (d)      | 1      | 3      | 5      | 7      | 9      | 12     | 15     |
|----------------------------|--------|--------|--------|--------|--------|--------|--------|
| SDBS in aqueous phase (mg) | 52.39  | 52.95  | 53.12  | 53.24  | 53.31  | 53.38  | 53.40  |
| SDBS in sludge phase (mg)  | 217.43 | 216.63 | 216.06 | 215.83 | 215.20 | 214.89 | 214.29 |
| Total SDBS in system (mg)  | 269.82 | 269.58 | 269.18 | 269.07 | 268.51 | 268.27 | 267.69 |

<sup>a</sup> Error bars represent standard deviations of triplicate measurements.
